# Supplementary material for: Self-assembly of melem on Au(111) and Ag(111): the origin of two different hydrogen bonding configurations
Source: Royal Society of Chemistry journal article supplement (doi:10.1039/c7cp03862c), 2017-01-01
Supplement: c7cp03862c1.pdf [file c7cp03862c1.pdf]

## Supplementary Materials for

### Self-assembly of Melem on Au(111) and Ag(111): the origin of two different hydrogen bonding configurations

Meiling Bao,<sup>a</sup> Xiaoqing Wei,<sup>b</sup> Liangliang Cai,<sup>a</sup> Qiang Sun,<sup>a</sup> Zhengxin Liu\*<sup>b</sup> and Wei Xu\*<sup>a</sup>

<sup>a</sup> *Interdisciplinary Materials Research Center, Tongji-Aarhus Joint Research Center for Nanostructures and Functional Nanomaterials, College of Materials Science and Engineering, Tongji University, Shanghai 201804, P. R. China*

<sup>b</sup> *Research Center for New Energy Technology, Shanghai Institute of Microsystem and Information Technology, Chinese Academy of Sciences, Shanghai 201800, China*

\*To whom correspondence should be addressed. E-mail: [xuwei@tongji.edu.cn](mailto:xuwei@tongji.edu.cn); [z.x.liu@mail.sim.ac.cn](mailto:z.x.liu@mail.sim.ac.cn)

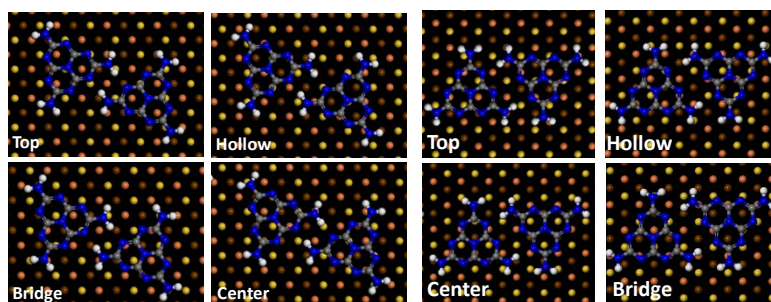

|         | Top        | Bridge     | Center     | Hollow     |
|---------|------------|------------|------------|------------|
| Motif-1 | -761.72 eV | -761.64 eV | -761.66 eV | -761.66 eV |
| Motif-2 | -761.50 eV | -761.37 eV | -761.47 eV | -761.33 eV |

Fig. S1 The different sites of Motif-1 and Motif-2 on Au(111) in the upper figure, and their respective energies are shown in the lower table.

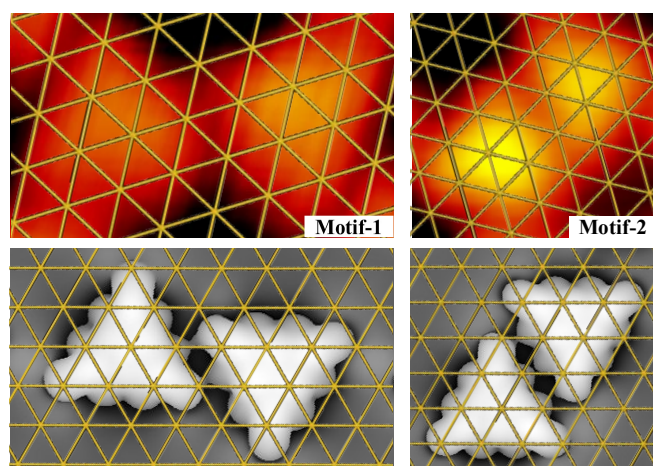

Fig. S2 The experimental STM images (top) and the Tersoff-Hamann STM simulations (below) of Motif-1 and Motif-2 on Au(111), where the lattices of the first Au(111) layer are indicated with grids.

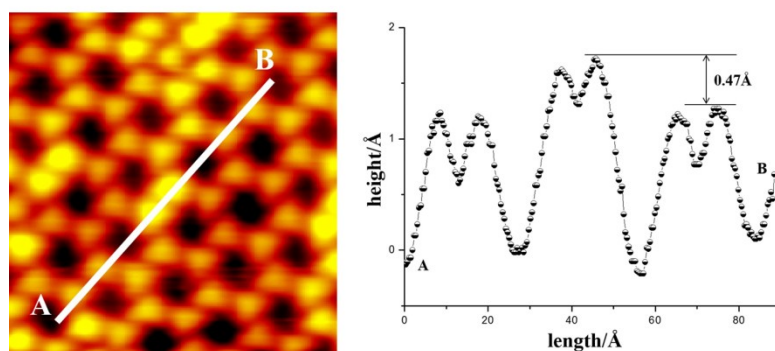

Fig. S3 Line profile across dim and bright dimer motifs, where the corresponding STM image and the position of the line profile is indicated in the left image.

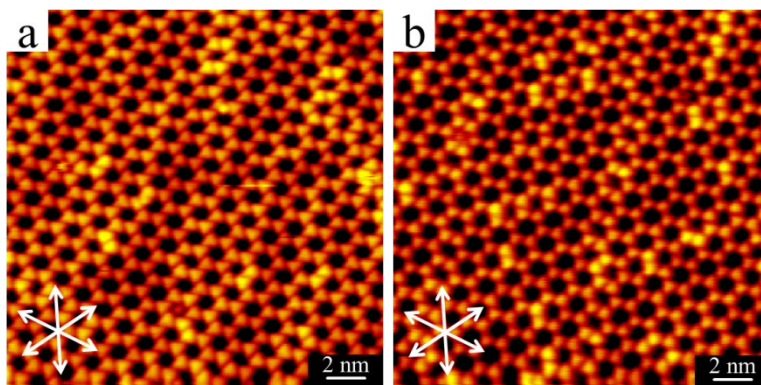

| Temperature          | 300K | 350K | 450K |
|----------------------|------|------|------|
| Bright dimers        |      |      |      |
| Isolated dimers      | 22%  | 38%  | 28%  |
| Aggregates of dimers | 78%  | 62%  | 72%  |

Fig. S4 (a) and (b) STM images showing melem molecules on Au(111) surface at 350K and 450K, respectively. The distribution of dimer is shown in the lower table at different temperatures.

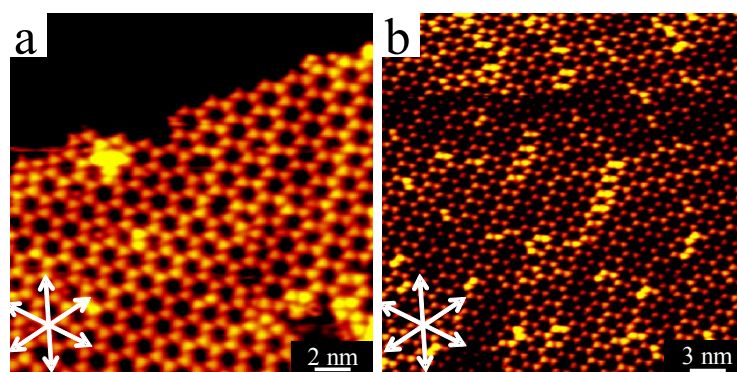

Fig. S5 (a) and (b) STM images showing melem molecules on Au(111) surface at different coverage. The proportion of bright dimers in (a) 0.2 ML is 2%, and (b) 0.5 ML of 3%

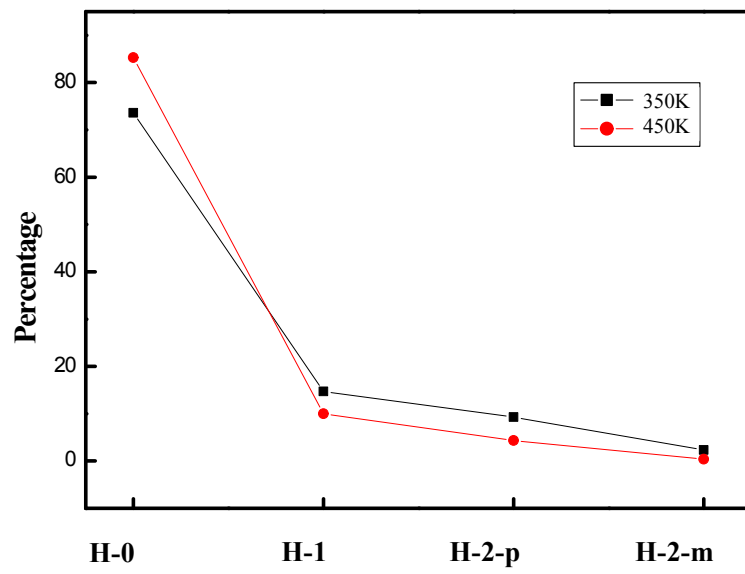

**Fig. S6 A** statistical distribution of the different hexamers observed on Au(111) at 350K and 450K.
